# Supplementary material for: Sex-dependent and body weight-dependent associations between environmental PAHs exposure and insulin resistance: Korean urban elderly panel
Source: PubMed Central journal article supplement — J Epidemiol Community Health. 2015 Feb 10;69(7):625–31. doi: 10.1136/jech-2014-204801 (PMC4484041; doi:10.1136/jech-2014-204801), 2015-02-10
Supplement: jech-2014-204801-s1.pdf [file jech-2014-204801-s1.pdf]

## **Supplementary text.**

### ***Discussion for DM patients.***

Most of study subjects with DM may be managed by antihyperglycemic agents or lifestyle change such as dietary modification or regular exercise without insulin treatment. From 168 DM patients in the present data, 80 subjects (47.62%) had diabetes treatments including antihyperglycemic agents or insulin therapy. Unfortunately, we could not examine the proportion of subjects treated with insulin, because there is no available information about the types of diabetes treatment. Instead, we examined its proportion using Korean National Health and Nutritional Examination Survey (KNHANES), a representative Korean general population, and found that only 3.7% of adult patients with diabetes treatments used insulin therapy; 91.6% used oral antihyperglycemic medication, and the remaining 4.7% used both. Therefore, we expect that DM patients may be unlikely to be treated with insulin in the present study. Nevertheless, our observation on enhanced effect in DM patients still needs to be interpreted carefully.

**Supplementary Table 1.** Baseline characteristics of included and excluded participants ( $n=560^a$ )

| Characteristic                                                 | Included Participants<br>( $n=502^b$ ) | Excluded Participants<br>( $n=58$ ) | <i>P</i> -value <sup>c</sup> |
|----------------------------------------------------------------|----------------------------------------|-------------------------------------|------------------------------|
| <b>Continuous variables (mean <math>\pm</math> SD)</b>         |                                        |                                     |                              |
| Age (y)                                                        | 70.8 $\pm$ 5.3                         | 70.0 $\pm$ 5.0                      | 0.287                        |
| BMI (kg/m <sup>2</sup> )                                       | 24.8 $\pm$ 2.9                         | 24.3 $\pm$ 2.3                      | 0.119                        |
| Fasting insulin ( $\mu$ U/mL)                                  | 7.0 $\pm$ 6.0                          | 6.2 $\pm$ 6.0 <sup>d</sup>          | 0.417                        |
| Fasting glucose (mmol/L)                                       | 5.34 $\pm$ 1.15                        | 5.37 $\pm$ 0.98 <sup>e</sup>        | 0.853                        |
| HOMA-IR <sup>f</sup>                                           | 1.7 $\pm$ 1.7                          | 1.6 $\pm$ 1.8 <sup>d</sup>          | 0.545                        |
| Urinary 1-OHP ( $\mu$ g/L) <sup>g</sup>                        | 0.12 (0.11-0.13)                       | 0.12 (0.10-0.16) <sup>h</sup>       | 0.893                        |
| Urinary cotinine ( $\mu$ g/g cr) <sup>g</sup>                  | 3.23 (2.69-3.86)                       | 3.34 (1.77-6.28) <sup>i</sup>       | 0.910                        |
| SBP (mm Hg)                                                    | 131.9 $\pm$ 16.5                       | 128.1 $\pm$ 17.4 <sup>j</sup>       | 0.114                        |
| DBP (mm Hg)                                                    | 74.6 $\pm$ 9.8                         | 72.2 $\pm$ 9.3 <sup>j</sup>         | 0.082                        |
| HDL-cholesterol (mg/dL)                                        | 50.9 $\pm$ 13.3                        | 49.6 $\pm$ 12.2 <sup>e</sup>        | 0.520                        |
| Ambient PM <sub>10</sub> ( $\mu$ g/m <sup>3</sup> on lag day1) | 44.4 $\pm$ 25.1                        | 43.7 $\pm$ 16.2 <sup>k</sup>        | 0.799                        |
| <b>Categorical variables [No. (%)]</b>                         |                                        |                                     |                              |
| Sex (Male)                                                     | 132 (26.3)                             | 14 (24.1)                           | 0.875                        |
| Education                                                      |                                        |                                     | 0.868                        |
| $\leq$ Elementary School                                       | 284 (56.6)                             | 23 (54.8) <sup>l</sup>              |                              |
| $\leq$ High School                                             | 164 (32.7)                             | 16 (38.1)                           |                              |
| $>$ High School                                                | 54 (10.8)                              | 3 (7.1)                             |                              |
| Moderate to vigorous physical activity                         | 313 (62.4)                             | 30 (68.2) <sup>d</sup>              | 0.517                        |
| Current hypertension                                           | 334 (66.5)                             | 26 (50.0) <sup>j</sup>              | 0.018                        |
| Current diabetes mellitus                                      | 168 (33.5)                             | 21 (42.9) <sup>h</sup>              | 0.208                        |

<sup>a</sup>Subjects (N=560) eligible for the study participants

<sup>b</sup>Participants (N=502) are the individuals having all interest variables in this study: urinary t,t-MA, HOMA-IR, age, sex, education, physical activity, BMI, current diagnosis of hypertension and diabetes mellitus, HDL-Cholesterol, cotinine, and air pollution at enrollment

<sup>c</sup>Continuous variables: t-test, categorical variables: X<sup>2</sup>: 2\*2 table (Fisher's Exact Test) or 2\*C table (Mantel-Haenszel Chi-Square Test)

Non-Participants (N=44<sup>d</sup>, 46<sup>e</sup>, 49<sup>h</sup>, 53<sup>i</sup>, 52<sup>j</sup>, 35<sup>k</sup>, 42<sup>l</sup>, and 58 for the others) are the individuals having the variable to be compared.

<sup>f</sup>HOMA index: fasting insulin ( $\mu$ U/mL) x fasting glucose (mmol/L)/22.5.

<sup>g</sup>Geometric means (95% confidence interval) were presented.

**Supplementary Table 2.** Fully-adjusted changes (95% CI) in HOMA-IR in relationship to 1-OHP quartiles

|                                               | HOMA-IR (score)     |
|-----------------------------------------------|---------------------|
| <b>Overall (n=502, obs=996)</b>               |                     |
| 1-OHP quartile ( $\mu\text{g/g cr}$ )         |                     |
| Q 1 (0.011-0.075)                             | 0 (Reference)       |
| Q 2 (0.075-0.124)                             | 0.28 (-0.16, 0.72)  |
| Q 3 (0.124-0.203)                             | 0.18 (-0.27, 0.63)  |
| Q 4 (0.204-4.461)                             | 0.57 (0.10, 1.04)   |
| <i>P</i> -Trend                               | 0.037               |
| <b>Males (n=132, obs=244)</b>                 |                     |
| 1-OHP quartile ( $\mu\text{g/g cr}$ )         |                     |
| Q 1 (0.011-0.075)                             | 0 (Reference)       |
| Q 2 (0.075-0.124)                             | -0.38 (-1.34, 0.57) |
| Q 3 (0.124-0.203)                             | -0.41 (-1.43, 0.61) |
| Q 4 (0.204-4.461)                             | 0.19 (-0.81, 1.18)  |
| <i>P</i> -Trend                               | 0.904               |
| <b>Males with low BMI (n=79, obs=148)</b>     |                     |
| 1-OHP quartile ( $\mu\text{g/g cr}$ )         |                     |
| Q 1 (0.011-0.075)                             | 0 (Reference)       |
| Q 2 (0.075-0.124)                             | -0.07 (-0.73, 0.59) |
| Q 3 (0.124-0.203)                             | -0.20 (-1.07, 0.67) |
| Q 4 (0.204-4.461)                             | 0.80 (-0.01, 1.60)  |
| <i>P</i> -Trend                               | 0.249               |
| <b>Males with high BMI (n=53, obs=96)</b>     |                     |
| 1-OHP quartile ( $\mu\text{g/g cr}$ )         |                     |
| Q 1 (0.011-0.075)                             | 0 (Reference)       |
| Q 2 (0.075-0.124)                             | -1.03 (-3.16, 1.11) |
| Q 3 (0.124-0.203)                             | -0.30 (-2.24, 1.65) |
| Q 4 (0.204-4.461)                             | -0.89 (-2.82, 1.04) |
| <i>P</i> -Trend                               | 0.484               |
| <b>Females (n=370, obs=752)</b>               |                     |
| 1-OHP quartile ( $\mu\text{g/g cr}$ )         |                     |
| Q 1 (0.011-0.075)                             | 0 (Reference)       |
| Q 2 (0.075-0.124)                             | 0.38 (-0.08, 0.85)  |
| Q 3 (0.124-0.203)                             | 0.22 (-0.25, 0.69)  |
| Q 4 (0.204-4.461)                             | 0.71 (0.22, 1.20)   |
| <i>P</i> -Trend                               | 0.013               |
| <b>Females with low BMI (n=199, obs=404)</b>  |                     |
| 1-OHP quartile ( $\mu\text{g/g cr}$ )         |                     |
| Q 1 (0.011-0.075)                             | 0 (Reference)       |
| Q 2 (0.075-0.124)                             | 0.57 (-0.03, 1.17)  |
| Q 3 (0.124-0.203)                             | -0.05 (-0.68, 0.57) |
| Q 4 (0.204-4.461)                             | 0.47 (-0.18, 1.12)  |
| <i>P</i> -Trend                               | 0.377               |
| <b>Females with high BMI (n=171, obs=348)</b> |                     |
| 1-OHP quartile ( $\mu\text{g/g cr}$ )         |                     |
| Q 1 (0.011-0.075)                             | 0 (Reference)       |
| Q 2 (0.075-0.124)                             | -0.12 (-0.83, 0.59) |
| Q 3 (0.124-0.203)                             | 0.36 (-0.32, 1.03)  |
| Q 4 (0.204-4.461)                             | 0.82 (0.09, 1.55)   |
| <i>P</i> -Trend                               | 0.023               |

Measures of effect medication: by sex difference ( $p=0.343$ ), by BMI difference within males ( $p=0.380$ ), by BMI difference within females ( $p=0.180$ )

Q, quartile (~25th%; ~median; ~75th%; ~100th%). Q1 is the reference.

Models were adjusted for age, sex, elapsed time, education, physical activities, BMI, hypertension, HDL-cholesterol, cotinine, and ambient  $\text{PM}_{10}$ .

**Supplementary Table 3.** Fully-adjusted changes (95% CI) in HOMA-IR in relationship to 1-OHP quartiles in participants without abnormal liver function ( $n=488$ )

|                                       | HOMA-IR (score) |               |
|---------------------------------------|-----------------|---------------|
| 1-OHP quartile ( $\mu\text{g/g cr}$ ) |                 |               |
| Q 1 (0.011-0.075)                     | 0 (Reference)   |               |
| Q 2 (0.075-0.124)                     | 0.26            | (-0.19, 0.71) |
| Q 3 (0.124-0.203)                     | 0.16            | (-0.31, 0.62) |
| Q 4 (0.204-4.461)                     | 0.56            | (0.08, 1.05)  |
| <i>P</i> -Trend                       | <i>0.043</i>    |               |

Q, quartile (~25th%; ~median; ~75th%; ~100th%). Q1 is the reference.

Models were adjusted for age, sex, elapsed time, education, physical activities, BMI, hypertension, HDL-cholesterol, cotinine, and ambient PM10.

**Supplementary Table 4.** Fully-adjusted changes (95% CI) in HOMA-IR in relation to 1-OHP quartiles

|                                          | HOMA-IR (score) |               |
|------------------------------------------|-----------------|---------------|
| <b>With diabetes (n=168, obs=323)</b>    |                 |               |
| 1-OHP quartile ( $\mu\text{g/g cr}$ )    |                 |               |
| Q 1 (0.011-0.075)                        | 0 (Reference)   |               |
| Q 2 (0.075-0.124)                        | 0.54            | (-0.41, 1.48) |
| Q 3 (0.124-0.203)                        | 0.77            | (-0.28, 1.82) |
| Q 4 (0.204-4.461)                        | 1.51            | (0.49, 2.52)  |
| <i>P</i> -Trend                          | 0.008           |               |
| <b>Without diabetes (n=334, obs=673)</b> |                 |               |
| 1-OHP quartile ( $\mu\text{g/g cr}$ )    |                 |               |
| Q 1 (0.011-0.075)                        | 0 (Reference)   |               |
| Q 2 (0.075-0.124)                        | 0.05            | (-0.40, 0.50) |
| Q 3 (0.124-0.203)                        | -0.07           | (-0.52, 0.38) |
| Q 4 (0.204-4.461)                        | 0.05            | (-0.43, 0.53) |
| <i>P</i> -Trend                          | 0.930           |               |

Q, quartile (~25th%; ~median; ~75th%; ~100th%). Q1 is the reference.

Models were adjusted for age, sex, elapsed time, education, physical activities, BMI, hypertension, HDL-cholesterol, cotinine, and ambient PM10.

**Supplementary Table 5.** Fully-adjusted changes (95% CI) in MDA in relationship to 1-OHP quartiles

|                                       | Urinary MDA ( $\mu\text{g/g cr}$ ) |
|---------------------------------------|------------------------------------|
| Overall (n=502, obs=996)              |                                    |
| 1-OHP quartile ( $\mu\text{g/g cr}$ ) |                                    |
| Q 1 (0.011-0.075)                     | 0 (Reference)                      |
| Q 2 (0.075-0.124)                     | 0.05 (-0.01, 0.11)                 |
| Q 3 (0.124-0.203)                     | 0.08 (0.01, 0.14)                  |
| Q 4 (0.204-4.461)                     | 0.14 (0.07, 0.21)                  |
| <i>P</i> -Trend                       | <0.001                             |

Q, quartile (~25th%; ~median; ~75th%; ~100th%). Q1 is the reference.

Models were adjusted for age, sex, elapsed time, education, physical activities, BMI, hypertension, HDL-cholesterol, cotinine, and ambient PM<sub>10</sub>.
